# Supplementary material
Source: PubMed Central journal article supplement (PMC3609715)
Supplement: NIHMS440133-supplement-1_si_001.pdf [file NIHMS440133-supplement-1_si_001.pdf]

## **Supporting Information**

### **Sequential Photooxidation of a Pt(II)(Diimine)Cysteamine Complex: Intermolecular Oxygen Atom Transfer vs. Sulfinate Formation**

Dong Zhang, Ye Bin, Lorillee Tallorin, Florence Tse, Blanca Hernandez, Errol V. Mathias, Timothy Stewart, Robert Bau<sup>§</sup> and Matthias Selke\*

California State University, Los Angeles, Los Angeles, California 90032 and Department of Chemistry, University of Southern California, Los Angeles, California 90089

## General Procedures

Solvents and chemicals used for synthetic procedures and photochemical studies were of reagent grade and were not purified unless noted otherwise.  $\text{PtCl}_2(2,2'\text{-bipyridine})$  and 2-aminoethanethiol hydrochloride were purchased from Aldrich Chemical Company. All deuterated solvents were purchased from Cambridge Isotope Laboratories, Inc. NMR spectra were recorded on a 400 MHz Bruker Avance II NMR spectrometer. The  $^{195}\text{Pt}$ -NMR spectra were referenced against  $\text{K}_2\text{PtCl}_4$  in  $\text{D}_2\text{O}$  with a chemical shift  $\delta = 0.0$  ppm. IR spectra were obtained from Nicolet AVATAR 320 FT-IR. UV-Vis spectra were recorded using a Varian Cary 300 Bio Spectrophotometer. Mass spectrometry was performed on a Thermo Scientific LCQ Fleet Ion Trap Mass Spectrometer.

## Synthesis of Complexes 1-3

Complex **1** was prepared by using the literature method developed by Jensen et al. (Scheme 1).<sup>1</sup>

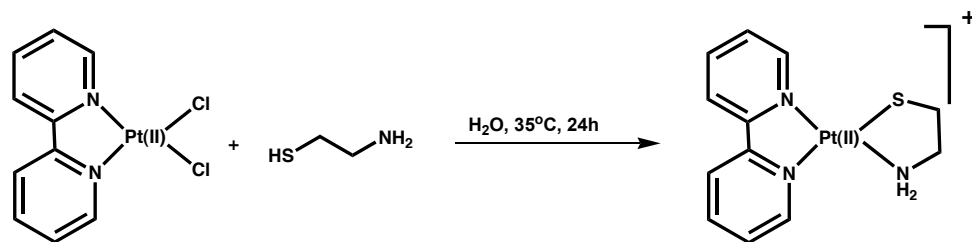

**Scheme 1.** Synthesis of Complex **1**.

Complexes **2** and **3** were prepared by reaction of **1** with singlet oxygen as described in the main text. Alternatively, for complex **2**, one molar equivalent of  $\text{H}_2\text{O}_2$  (30%) was added to compound **1** previously dissolved in  $\text{D}_2\text{O}$ . For complex **3**, two equivalents of  $\text{H}_2\text{O}_2$  (30%) were added to compound **1** dissolved in  $\text{D}_2\text{O}$ .  $\text{D}_2\text{O}$  was subsequently removed from the reaction mixture at room temperature under vacuum for approximately 5-7 hrs.  $^{195}\text{Pt}$  NMR data, FTIR data for the sulfenate or sulfinato stretches of **2** and **3** and UV/vis spectra for complexes **1-3** are shown below.

<sup>1</sup> Mitchell, K. A.; Jensen, C. M. *Inorg. Chem.* **1995**, *34*, 4441-4446.

## $^{195}\text{Pt}$ -NMR Spectra of Complexes (1), (2), and (3)

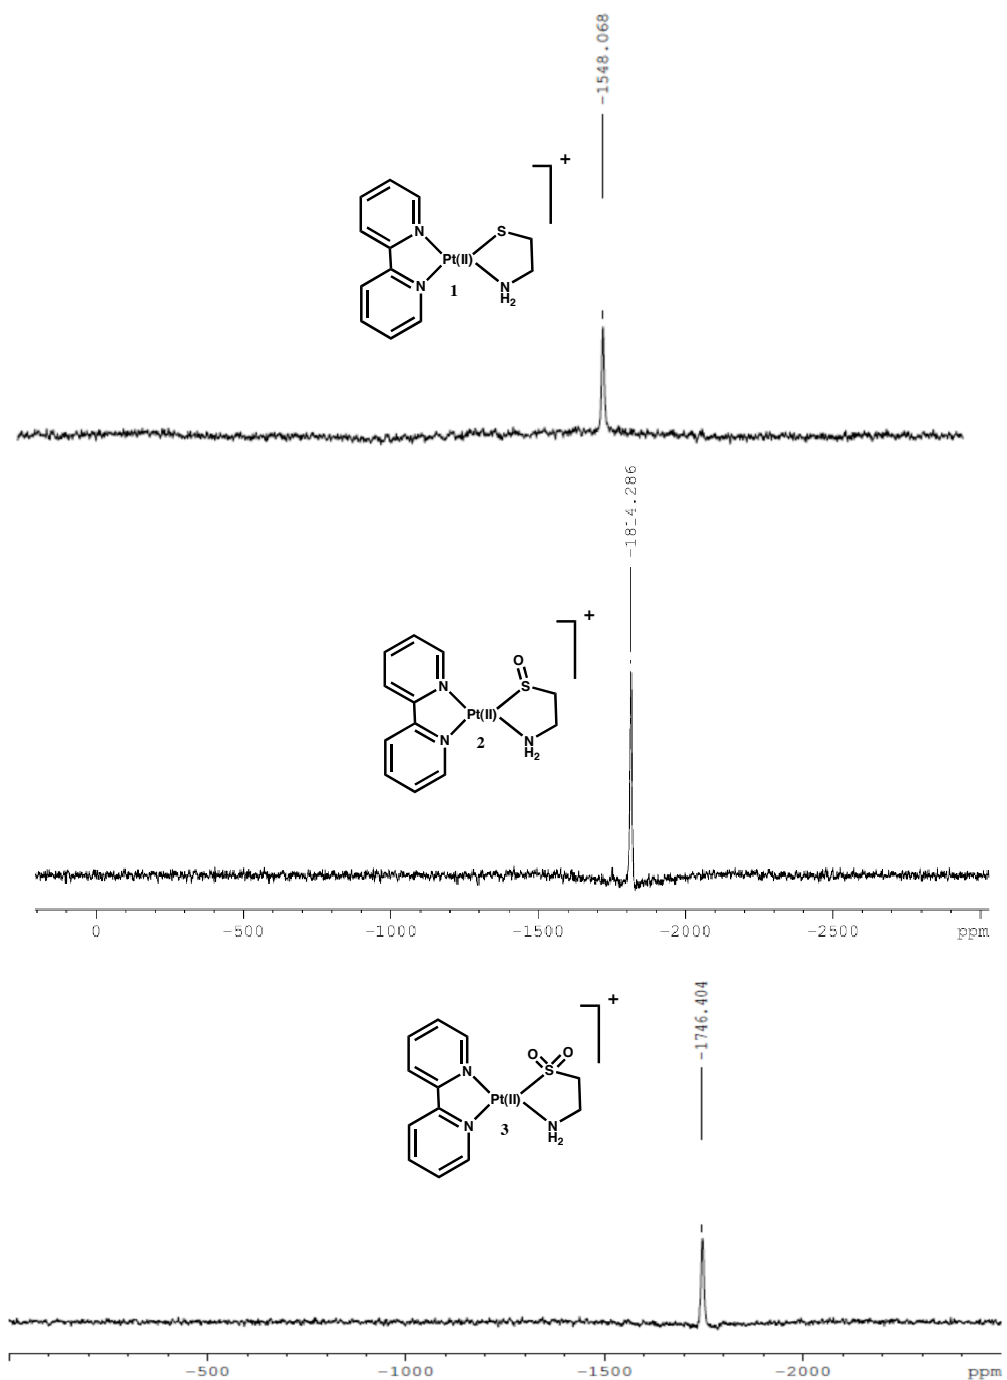

**Figure 1.**  $^{195}\text{Pt}$ -NMR of complexes **1**, **2**, and **3** with chemical shifts of -1548 ppm (**1**), -1814 ppm (**2**), and -1746 ppm (**3**). Samples were obtained by dissolving 10.0 mg (0.0216 mmol) of **1** or 13.0 mg (0.0271 mmol) of **2** or 10.0 mg (0.0202 mmol) of **3** in 1 mL  $\text{D}_2\text{O}$ . Reference:  $\text{K}_2\text{PtCl}_4$ .

**Table 1.** Spectroscopic Properties for Complexes **1**, **2**, and **3**.

| Complex  | $^{195}\text{Pt}$ -NMR <sup>a</sup> (ppm) | LC-MS (m/z) [M - Cl] <sup>+</sup> | IR <sup>b</sup> (cm <sup>-1</sup> ) Pt-S=O | IR <sup>b</sup> (cm <sup>-1</sup> ) Pt-S(=O) <sub>2</sub> | IR <sup>b</sup> (cm <sup>-1</sup> ) Pt-S(=O) <sub>2</sub> O <sup>18</sup> | UV-Vis <sup>c</sup> [ $\lambda$ max (nm), $\epsilon$ (M <sup>-1</sup> cm <sup>-1</sup> )] |
|----------|-------------------------------------------|-----------------------------------|--------------------------------------------|-----------------------------------------------------------|---------------------------------------------------------------------------|-------------------------------------------------------------------------------------------|
| <b>1</b> | -1548                                     | 427                               | -                                          | -                                                         | -                                                                         | 295 (1.25 x 10 <sup>4</sup> ), 421 (2.03 x 10 <sup>3</sup> )                              |
| <b>2</b> | -1814                                     | 443                               | 918                                        | -                                                         | -                                                                         | 307 (3.72 x 10 <sup>4</sup> ), 319 (4.52 x 10 <sup>4</sup> )                              |
| <b>3</b> | -1746                                     | 459                               | -                                          | 1210<br>1070                                              | 1162<br>1024                                                              | 316 (1.23 x 10 <sup>3</sup> )                                                             |

<sup>a</sup> Ref.: K<sub>2</sub>PtCl<sub>4</sub> in D<sub>2</sub>O.

<sup>a,c</sup> Samples were dissolved in D<sub>2</sub>O

<sup>b</sup> KBr pellet

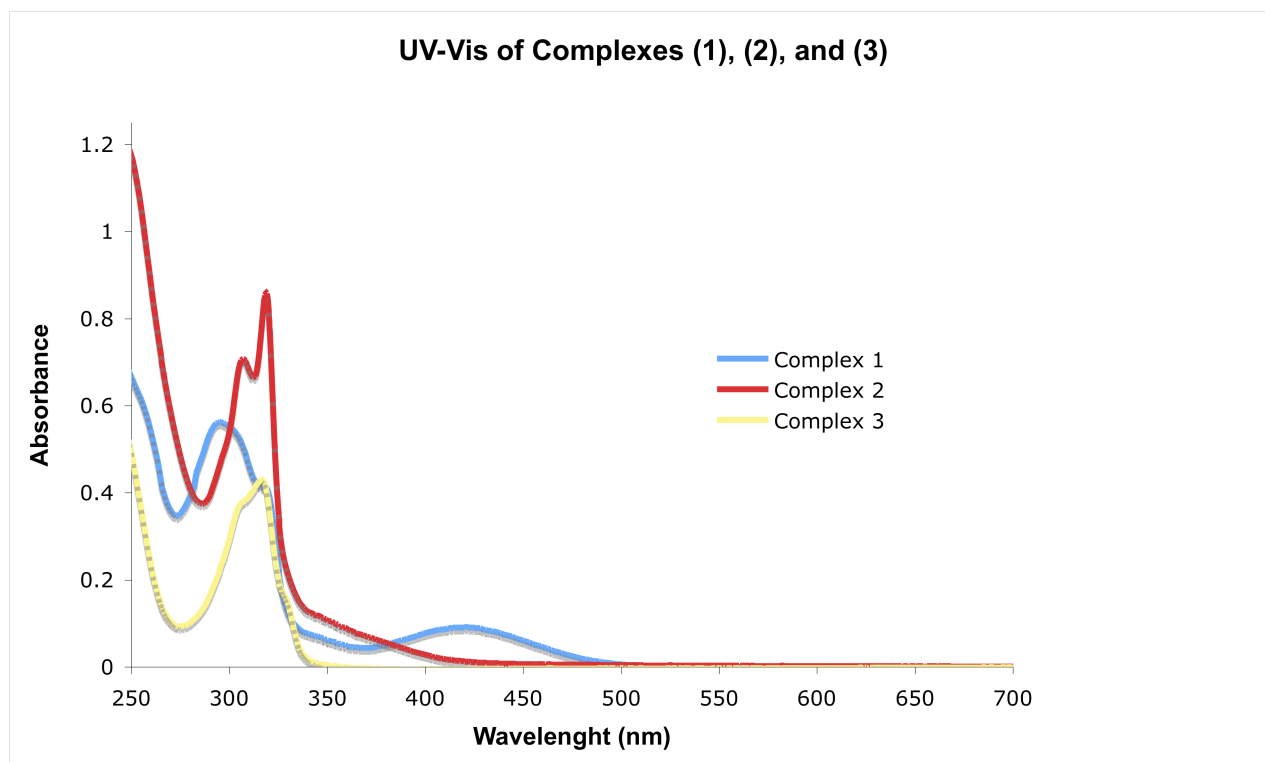**Figure 2.** UV-Vis Spectra of complexes **1**, **2**, and **3** in water.

## Singlet Oxygen Experiments for Complexes 1-4

Singlet oxygen luminescence quenching experiments were carried out with a nanosecond pulsed Nd:YAG laser at an excitation wavelength of 532 nm. Singlet oxygen luminescence was observed with a liquid nitrogen cooled Ge photodiode detector (Applied Detector Corp. Model 403HS). A combination of several band-pass filters was used to remove undesired radiation outside the NIR emission of singlet oxygen. A Schott color glass filter (model RG850; cut-on 850 nm; Newport, USA) was taped to the sapphire entrance of the detector to block any additional ultraviolet and visible light from entering. The port opening to the detector contained a long wave pass filter (silicon filter model 10LWFw1000; Newport, USA) that transmits in the range of 1100-2220 nm and blocks in the range of 800-954 nm. A band pass filter (model BP-1270-080-B\*; CWL 1270 nm; Spectrogen, USA) blocked radiation in the UV, visible, and IR regions and only transmitted in the range of 1200-1310 nm with maximum transmission of 60% at 1270 nm. All  $^1\text{O}_2$  luminescence experiments were run in air-saturated solvents. For  $k_T$  measurements, a 2 ml solution of Methylene Blue in  $\text{D}_2\text{O}$  in a fluorescence cell was used as photosensitizer. Aliquots (10-60  $\mu\text{L}$ ) of  $\text{D}_2\text{O}$  stock solutions of complexes **1**, **2**, and **3** were added to this methylene blue solution. Concentrations of the stock solutions ranged from 0.0216 mmol to 0.0271 mmol.  $^1\text{O}_2$  luminescence decay signals were recorded on a 500 MHz oscilloscope (LeCroy 9350 CM) and fitted to a first order exponential function on Origin 7.0. The  $k_T$  value for complex **4** was determined in the same way, except that complex **4** was dissolved in  $\text{CD}_2\text{Cl}_2$ .

A sample plot for the rate of singlet oxygen removal,  $k_T$ , of complexes **1** and **2** in  $\text{D}_2\text{O}$  are shown on the next page (Figure 3).

Singlet oxygen quantum yields were determined with the same set-up. Samples were prepared in  $\text{D}_2\text{O}$  (complexes **1-3**) or  $\text{CD}_2\text{Cl}_2$  (complex **4**) with the OD at 532 nm ranging from 0.1–0.3. Complexes **1-3** showed no near infrared signal for singlet oxygen emission. For complex **4**, the characteristic  $^1\text{O}_2$  emission signal was observed. The quantum yield of **4** was calculated from the intensity of the singlet oxygen emission signal, using  $\text{C}_{60}$  as a reference sensitizer. The  $^1\text{O}_2$  intensity signal was extrapolated to  $t = 0$ . The data points of the initial 0–5  $\mu\text{s}$  were not used due to electronic interference signals from the detector.

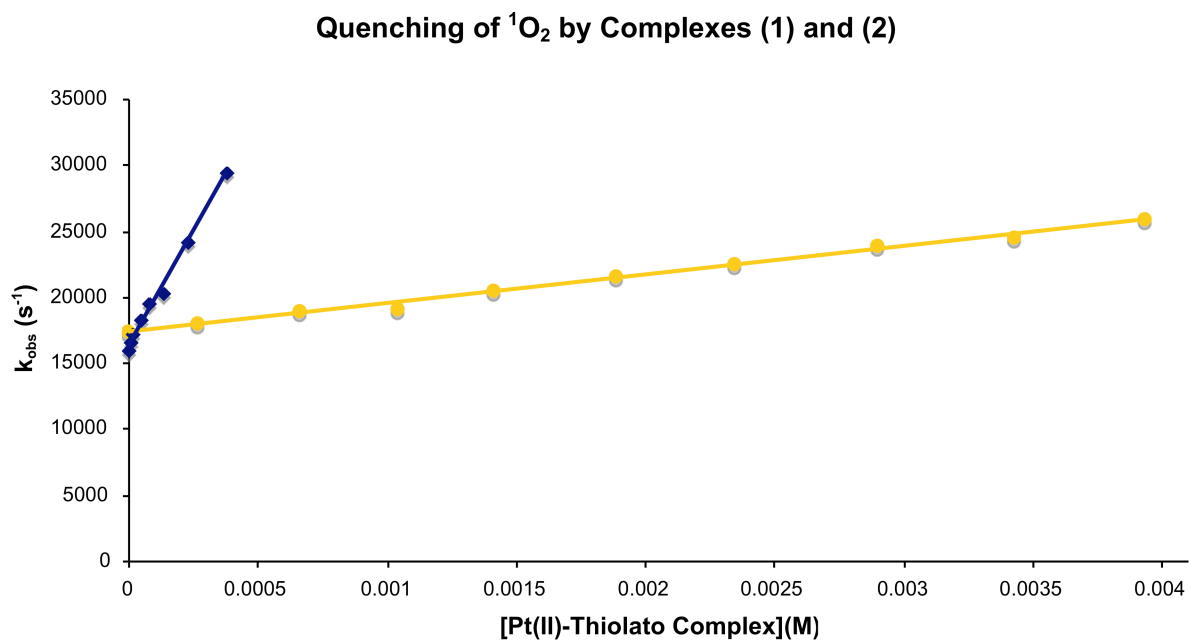

**Figure 3.** Sample  $^1\text{O}_2$  luminescence quenching plots for complexes **1** (◆) and **2** (●). The slopes represent the total rate constants of singlet oxygen removal ( $k_{\text{T}}$ ) by each complex.

### X-ray Data Collection, Structure Determination and Refinement for C<sub>12</sub> H<sub>18</sub> Cl N<sub>3</sub> O<sub>3</sub> Pt S.

A yellow rod crystal of approximate dimensions 0.24 x 0.17 x 0.14 mm<sup>3</sup> is mounted on a Cryoloop with Paratone oil and transferred to a Bruker CCD platform diffractometer with graphite fine-focused monochromatic Mo-K<sub>α</sub> radiation ( $\lambda = 0.71073 \text{ \AA}$ ). The data were collected in a nitrogen gas stream at 143(2) K using phi and omega scans. The crystal-to-detector distance is 60 mm and exposure time of 10 seconds per frame using a scan width of 0.3° up to a resolution of 0.77 Å. The SMART [1] program package was used to determine the unit-cell parameters and for data collection (20 sec / frame scan time for a sphere of diffraction data). The raw frame data was processed using SAINT [2] and SADABS [3] to yield the reflection data file. Subsequent calculations were carried out using the SHEXLTL [4] program. The structure is solved by direct methods (SIR-97) and refined on F<sup>2</sup> by full-matrix least squares techniques to produce a complete heavy-atom phasing model consistent with the proposed structure. The analytical scattering factors [5] for neutral atoms were used throughout the analysis. Data collection was 97.9% complete to 27.53° in theta. A total of 9,141 reflections were collected covering the  $-15 \leq h \leq 15$ ,  $-23 \leq k \leq 12$ ,  $-9 \leq l \leq 9$ . 3421 reflections were found to be symmetry independent, with a R(int) of 0.0223. Indexing and unit-cell refinement indicated a primitive, monoclinic Laue group. The space group was found to be P2(1)/c (No. 14). All non-hydrogen atoms were refined anisotropically by the full matrix least-squares (SHELXL-97). Most hydrogen atoms were placed using a riding model corresponding to the respective carbon. Their positions were constrained using an appropriate HFIX cards in SHELXL-97 software.

Final structure refinement for C<sub>12</sub> H<sub>18</sub> Cl N<sub>3</sub> O<sub>3</sub> Pt S molecule convergence resulted in R<sub>1</sub> = 0.021 and wR<sub>2</sub> = 0.046 for those data  $I > 2\sigma(I)$ . The data to parameter ratio is 16 : 1 and Goodness-of-fit on F<sup>2</sup> equals 1.062, Z equals 4, and unit cell dimensions: a = 11.9802(16) Å, b = 17.800(2) Å, c = 7.1567(10) Å, angle  $\beta = 95.955(2)^\circ$ . There is one molecule in the asymmetric unit. Relevant crystallographic data is summarized in Tables 1 - 5 listed below:

There are two water (H<sub>2</sub>O) molecules located in the crystal lattice, the hydrogen atoms were located from the difference Fourier maps and allowed to refine in least-squares procedure.

**Reference.**

[1] SMART Software Users Guide, Version 5.1, Bruker Analytical X-Ray Systems, Inc.; Madison, WI, **1999**.

[2] SAINT Software Users Guide, Version 6.0, Bruker Analytical X-Ray Systems, Inc.; Madison, WI, **1999**.

[3] Sheldrick, G.M.: SADABS, Version 2.10, Bruker Analytical X-Ray Systems, Inc.; Madison, WI, **2002**.

[4] Sheldrick, G.M.: SHELXTL, Version 6.12, Bruker Analytical X-Ray Systems, Inc. Madison, WI, **2001**.

[5] International Tables for X-Ray Crystallography **1992**, Vol. C., Dordrecht: Kluwer Academic Publishers.



Table 1. Crystal data and structure refinement for C<sub>12</sub>H<sub>18</sub>ClN<sub>3</sub>O<sub>3</sub>PtS.

|                                   |                                                                       |                 |
|-----------------------------------|-----------------------------------------------------------------------|-----------------|
| Identification code               | ptclm                                                                 |                 |
| Empirical formula                 | C <sub>12</sub> H <sub>18</sub> Cl N <sub>3</sub> O <sub>3</sub> Pt S |                 |
| Formula weight                    | 514.89                                                                |                 |
| Temperature                       | 143(2) K                                                              |                 |
| Wavelength                        | 0.71073 Å                                                             |                 |
| Crystal system                    | Monoclinic                                                            |                 |
| Space group                       | P2(1)/c                                                               |                 |
| Unit cell dimensions              | a = 11.9802(16) Å                                                     | α = 90°.        |
|                                   | b = 17.800(2) Å                                                       | β = 95.955(2)°. |
|                                   | c = 7.1567(10) Å                                                      | γ = 90°.        |
| Volume                            | 1517.9(4) Å <sup>3</sup>                                              |                 |
| Z                                 | 4                                                                     |                 |
| Density (calculated)              | 2.253 Mg/m <sup>3</sup>                                               |                 |
| Absorption coefficient            | 9.570 mm <sup>-1</sup>                                                |                 |
| F(000)                            | 984                                                                   |                 |
| Crystal size                      | 0.24 x 0.17 x 0.14 mm <sup>3</sup>                                    |                 |
| Theta range for data collection   | 1.71 to 27.53°.                                                       |                 |
| Index ranges                      | -15 ≤ h ≤ 15, -23 ≤ k ≤ 12, -9 ≤ l ≤ 9                                |                 |
| Reflections collected             | 9141                                                                  |                 |
| Independent reflections           | 3421 [R(int) = 0.0223]                                                |                 |
| Completeness to theta = 27.53°    | 97.9 %                                                                |                 |
| Absorption correction             | Empirical                                                             |                 |
| Max. and min. transmission        | 0.3476 and 0.2072                                                     |                 |
| Refinement method                 | Full-matrix least-squares on F <sup>2</sup>                           |                 |
| Data / restraints / parameters    | 3421 / 0 / 206                                                        |                 |
| Goodness-of-fit on F <sup>2</sup> | 1.062                                                                 |                 |
| Final R indices [I > 2σ(I)]       | R1 = 0.0207, wR2 = 0.0459                                             |                 |
| R indices (all data)              | R1 = 0.0228, wR2 = 0.0467                                             |                 |
| Largest diff. peak and hole       | 1.151 and -0.863 e.Å <sup>-3</sup>                                    |                 |

Table 2. Atomic coordinates ( $\times 10^4$ ) and equivalent isotropic displacement parameters ( $\text{\AA}^2 \times 10^3$ ) for C<sub>12</sub>H<sub>18</sub>ClN<sub>3</sub>O<sub>3</sub>PtS. U(eq) is defined as one third of the trace of the orthogonalized U<sup>ij</sup> tensor.

|       | x       | y       | z       | U(eq) |
|-------|---------|---------|---------|-------|
| Pt(1) | 7510(1) | 1276(1) | 7237(1) | 18(1) |
| N(1)  | 6655(2) | 290(2)  | 6852(4) | 26(1) |
| N(2)  | 8243(2) | 2297(2) | 7652(4) | 19(1) |
| N(3)  | 6193(2) | 1969(2) | 6191(4) | 19(1) |
| O(1)  | 9997(2) | 682(2)  | 7276(4) | 38(1) |
| S(1)  | 8996(1) | 573(1)  | 8391(1) | 27(1) |
| C(1)  | 8417(3) | -335(2) | 7554(7) | 39(1) |
| C(2)  | 7222(4) | -363(2) | 7829(7) | 41(1) |
| C(3)  | 9309(3) | 2429(2) | 8391(5) | 23(1) |
| C(4)  | 9722(3) | 3145(2) | 8717(5) | 27(1) |
| C(5)  | 9034(3) | 3754(2) | 8277(5) | 25(1) |
| C(6)  | 7939(3) | 3627(2) | 7507(5) | 23(1) |
| C(7)  | 7566(3) | 2903(2) | 7201(4) | 18(1) |
| C(8)  | 6425(3) | 2717(2) | 6350(5) | 20(1) |
| C(9)  | 5633(3) | 3252(2) | 5718(5) | 23(1) |
| C(10) | 4595(3) | 3019(2) | 4888(5) | 25(1) |
| C(11) | 4373(3) | 2262(2) | 4706(5) | 26(1) |
| C(12) | 5187(3) | 1752(2) | 5365(5) | 24(1) |
| Cl(1) | 6043(1) | 9803(1) | 2545(1) | 29(1) |
| O(2)  | 1964(3) | 1408(2) | 7580(5) | 43(1) |
| O(3)  | 8037(3) | 7923(2) | 8592(5) | 45(1) |

Table 3. Bond lengths [ $\text{\AA}$ ] and angles [ $^\circ$ ] for  $\text{C}_{12}\text{H}_{18}\text{ClN}_3\text{O}_3\text{PtS}$ .

---

|             |           |
|-------------|-----------|
| Pt(1)-N(2)  | 2.026(3)  |
| Pt(1)-N(1)  | 2.037(3)  |
| Pt(1)-N(3)  | 2.080(3)  |
| Pt(1)-S(1)  | 2.2614(9) |
| N(1)-C(2)   | 1.485(5)  |
| N(1)-H(1A)  | 0.9200    |
| N(1)-H(1B)  | 0.9200    |
| N(2)-C(3)   | 1.351(4)  |
| N(2)-C(7)   | 1.368(4)  |
| N(3)-C(12)  | 1.343(4)  |
| N(3)-C(8)   | 1.362(4)  |
| O(1)-S(1)   | 1.520(3)  |
| S(1)-C(1)   | 1.834(4)  |
| C(1)-C(2)   | 1.466(6)  |
| C(1)-H(1C)  | 0.9900    |
| C(1)-H(1D)  | 0.9900    |
| C(2)-H(2A)  | 0.9900    |
| C(2)-H(2B)  | 0.9900    |
| C(3)-C(4)   | 1.378(5)  |
| C(3)-H(3)   | 0.9500    |
| C(4)-C(5)   | 1.378(5)  |
| C(4)-H(4)   | 0.9500    |
| C(5)-C(6)   | 1.387(5)  |
| C(5)-H(5)   | 0.9500    |
| C(6)-C(7)   | 1.375(5)  |
| C(6)-H(6)   | 0.9500    |
| C(7)-C(8)   | 1.474(4)  |
| C(8)-C(9)   | 1.387(5)  |
| C(9)-C(10)  | 1.385(5)  |
| C(9)-H(9)   | 0.9500    |
| C(10)-C(11) | 1.376(5)  |
| C(10)-H(10) | 0.9500    |
| C(11)-C(12) | 1.380(5)  |
| C(11)-H(11) | 0.9500    |

|                  |            |
|------------------|------------|
| C(12)-H(12)      | 0.9500     |
| O(2)-H(2C)       | 0.79(3)    |
| O(2)-H(2D)       | 0.86(5)    |
| O(3)-H(3C)       | 0.91(6)    |
| O(3)-H(3D)       | 0.94(11)   |
| N(2)-Pt(1)-N(1)  | 175.41(11) |
| N(2)-Pt(1)-N(3)  | 79.77(10)  |
| N(1)-Pt(1)-N(3)  | 96.31(11)  |
| N(2)-Pt(1)-S(1)  | 97.50(8)   |
| N(1)-Pt(1)-S(1)  | 86.43(8)   |
| N(3)-Pt(1)-S(1)  | 177.25(8)  |
| C(2)-N(1)-Pt(1)  | 114.4(2)   |
| C(2)-N(1)-H(1A)  | 108.7      |
| Pt(1)-N(1)-H(1A) | 108.7      |
| C(2)-N(1)-H(1B)  | 108.7      |
| Pt(1)-N(1)-H(1B) | 108.7      |
| H(1A)-N(1)-H(1B) | 107.6      |
| C(3)-N(2)-C(7)   | 118.0(3)   |
| C(3)-N(2)-Pt(1)  | 126.2(2)   |
| C(7)-N(2)-Pt(1)  | 115.8(2)   |
| C(12)-N(3)-C(8)  | 118.9(3)   |
| C(12)-N(3)-Pt(1) | 126.9(2)   |
| C(8)-N(3)-Pt(1)  | 114.1(2)   |
| O(1)-S(1)-C(1)   | 103.48(18) |
| O(1)-S(1)-Pt(1)  | 111.79(11) |
| C(1)-S(1)-Pt(1)  | 96.42(13)  |
| C(2)-C(1)-S(1)   | 109.2(3)   |
| C(2)-C(1)-H(1C)  | 109.8      |
| S(1)-C(1)-H(1C)  | 109.8      |
| C(2)-C(1)-H(1D)  | 109.8      |
| S(1)-C(1)-H(1D)  | 109.8      |
| H(1C)-C(1)-H(1D) | 108.3      |
| C(1)-C(2)-N(1)   | 108.3(3)   |
| C(1)-C(2)-H(2A)  | 110.0      |
| N(1)-C(2)-H(2A)  | 110.0      |
| C(1)-C(2)-H(2B)  | 110.0      |

|                   |          |
|-------------------|----------|
| N(1)-C(2)-H(2B)   | 110.0    |
| H(2A)-C(2)-H(2B)  | 108.4    |
| N(2)-C(3)-C(4)    | 122.3(3) |
| N(2)-C(3)-H(3)    | 118.9    |
| C(4)-C(3)-H(3)    | 118.9    |
| C(5)-C(4)-C(3)    | 119.6(3) |
| C(5)-C(4)-H(4)    | 120.2    |
| C(3)-C(4)-H(4)    | 120.2    |
| C(4)-C(5)-C(6)    | 118.8(3) |
| C(4)-C(5)-H(5)    | 120.6    |
| C(6)-C(5)-H(5)    | 120.6    |
| C(7)-C(6)-C(5)    | 119.6(3) |
| C(7)-C(6)-H(6)    | 120.2    |
| C(5)-C(6)-H(6)    | 120.2    |
| N(2)-C(7)-C(6)    | 121.7(3) |
| N(2)-C(7)-C(8)    | 115.0(3) |
| C(6)-C(7)-C(8)    | 123.3(3) |
| N(3)-C(8)-C(9)    | 121.1(3) |
| N(3)-C(8)-C(7)    | 115.2(3) |
| C(9)-C(8)-C(7)    | 123.6(3) |
| C(10)-C(9)-C(8)   | 119.1(3) |
| C(10)-C(9)-H(9)   | 120.4    |
| C(8)-C(9)-H(9)    | 120.4    |
| C(11)-C(10)-C(9)  | 119.4(3) |
| C(11)-C(10)-H(10) | 120.3    |
| C(9)-C(10)-H(10)  | 120.3    |
| C(10)-C(11)-C(12) | 119.2(3) |
| C(10)-C(11)-H(11) | 120.4    |
| C(12)-C(11)-H(11) | 120.4    |
| N(3)-C(12)-C(11)  | 122.1(3) |
| N(3)-C(12)-H(12)  | 118.9    |
| C(11)-C(12)-H(12) | 118.9    |
| H(2C)-O(2)-H(2D)  | 108(4)   |
| H(3C)-O(3)-H(3D)  | 109(7)   |

---

Symmetry transformations used to generate equivalent atoms:

Table 4. Anisotropic displacement parameters ( $\text{\AA}^2 \times 10^3$ ) for C12H18ClN3O3PtS. The anisotropic displacement factor exponent takes the form:  $-2\pi^2[ h^2 a^{*2}U^{11} + \dots + 2 h k a^* b^* U^{12} ]$

|       | U <sup>11</sup> | U <sup>22</sup> | U <sup>33</sup> | U <sup>23</sup> | U <sup>13</sup> | U <sup>12</sup> |
|-------|-----------------|-----------------|-----------------|-----------------|-----------------|-----------------|
| Pt(1) | 18(1)           | 15(1)           | 21(1)           | 0(1)            | 1(1)            | 1(1)            |
| N(1)  | 27(2)           | 18(2)           | 31(2)           | -4(1)           | 0(1)            | 0(1)            |
| N(2)  | 19(1)           | 17(1)           | 21(1)           | 3(1)            | 3(1)            | 1(1)            |
| N(3)  | 18(1)           | 18(1)           | 20(1)           | 1(1)            | 2(1)            | 1(1)            |
| O(1)  | 24(1)           | 35(2)           | 55(2)           | 9(1)            | 6(1)            | 3(1)            |
| S(1)  | 25(1)           | 21(1)           | 34(1)           | 2(1)            | 1(1)            | 6(1)            |
| C(1)  | 34(2)           | 21(2)           | 63(3)           | 2(2)            | 8(2)            | 4(2)            |
| C(2)  | 43(2)           | 23(2)           | 54(3)           | 3(2)            | -5(2)           | 1(2)            |
| C(3)  | 18(2)           | 25(2)           | 27(2)           | 1(1)            | 2(1)            | 1(1)            |
| C(4)  | 21(2)           | 31(2)           | 29(2)           | -3(2)           | 2(1)            | -4(1)           |
| C(5)  | 26(2)           | 23(2)           | 28(2)           | -4(1)           | 7(2)            | -4(1)           |
| C(6)  | 25(2)           | 20(2)           | 24(2)           | 0(1)            | 6(1)            | 2(1)            |
| C(7)  | 19(2)           | 21(2)           | 15(2)           | 0(1)            | 4(1)            | 2(1)            |
| C(8)  | 21(2)           | 22(2)           | 16(2)           | 1(1)            | 4(1)            | 2(1)            |
| C(9)  | 26(2)           | 19(2)           | 25(2)           | 3(1)            | 7(1)            | 1(1)            |
| C(10) | 22(2)           | 27(2)           | 26(2)           | 6(1)            | 4(1)            | 7(1)            |
| C(11) | 19(2)           | 35(2)           | 22(2)           | 0(2)            | 0(1)            | -1(2)           |
| C(12) | 22(2)           | 23(2)           | 25(2)           | -1(1)           | 1(1)            | -2(1)           |
| Cl(1) | 29(1)           | 23(1)           | 35(1)           | -2(1)           | 3(1)            | -4(1)           |
| O(2)  | 29(2)           | 30(2)           | 68(2)           | 1(2)            | 1(2)            | -1(1)           |
| O(3)  | 50(2)           | 31(2)           | 55(2)           | 7(2)            | 14(2)           | 3(1)            |

Table 5. Hydrogen coordinates ( $\times 10^4$ ) and isotropic displacement parameters ( $\text{\AA}^2 \times 10^{-3}$ ) for C<sub>12</sub>H<sub>18</sub>CIN<sub>3</sub>O<sub>3</sub>PtS.

|       | x        | y        | z         | U(eq)   |
|-------|----------|----------|-----------|---------|
| H(1A) | 5959     | 348      | 7270      | 31      |
| H(1B) | 6547     | 189      | 5586      | 31      |
| H(1C) | 8512     | -397     | 6205      | 47      |
| H(1D) | 8822     | -748     | 8258      | 47      |
| H(2A) | 7128     | -345     | 9187      | 49      |
| H(2B) | 6887     | -837     | 7309      | 49      |
| H(3)  | 9791     | 2013     | 8696      | 28      |
| H(4)  | 10475    | 3218     | 9243      | 32      |
| H(5)  | 9305     | 4251     | 8495      | 30      |
| H(6)  | 7450     | 4038     | 7194      | 27      |
| H(9)  | 5800     | 3773     | 5852      | 27      |
| H(10) | 4042     | 3377     | 4449      | 30      |
| H(11) | 3667     | 2093     | 4132      | 31      |
| H(12) | 5031     | 1231     | 5230      | 28      |
| H(2C) | 2460(30) | 1115(19) | 7660(40)  | 0(8)    |
| H(2D) | 1340(40) | 1160(30) | 7520(70)  | 46(14)  |
| H(3C) | 7920(50) | 7420(40) | 8480(90)  | 90(20)  |
| H(3D) | 7970(80) | 8070(60) | 9840(160) | 210(50) |
